# Supplementary material for: Synthesis and structure of the new pentanary uranium(vi) silicate, K4CaUSi4O14, a member of a structural family related to fresnoite
Source: Royal Society of Chemistry journal article supplement (doi:10.1039/c5ce00504c), 2015-01-01
Supplement: c5ce00504c1.pdf [file c5ce00504c1.pdf]

***Electronic supplementary information (ESI)***

Synthesis and Structure of the New Pentanary Uranium (VI) Silicate,

$K_4CaUSi_4O_{14}$ , a Member of a Structural Family Related to Fresnoite

Gregory Morrison,<sup>1</sup> Mark D. Smith,<sup>1</sup> T. Thao Tran,<sup>2</sup> P. Shiv Halasyamani,<sup>2</sup> Hans-Conrad zur Loyer<sup>1\*</sup>

<sup>1</sup>Department of Chemistry and Biochemistry, University of South Carolina, Columbia, SC, 29208

<sup>2</sup>Department of Chemistry, University of Houston, Houston, TX, 77204

\*Corresponding Author: E-mail: [zurloye@mailbox.sc.edu](mailto:zurloye@mailbox.sc.edu)

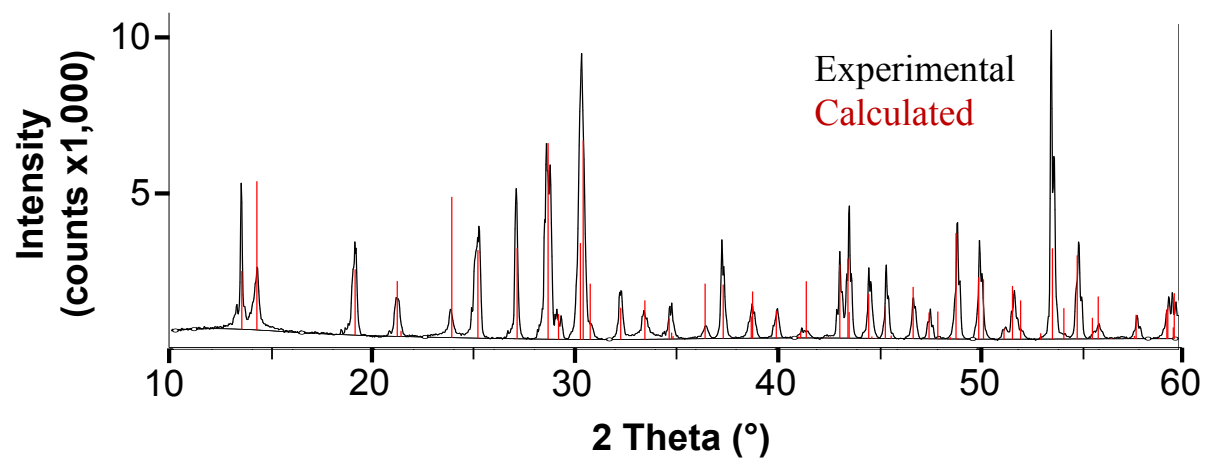

**Figure S1.** Powder X-ray diffraction pattern of  $K_4CaUSi_4O_{14}$  with calculated pattern shown in red.
